# Supplementary material
Source: ML conference proceedings conference paper supplement (https://openaccess.thecvf.com/content/CVPR2024/html/Zhang_Imagine_Before_Go_CVPR_2024_paper.html)
Supplement: Supplementary file 3 [file Zhang_Imagine_Before_Go_CVPR_2024_supplemental.zip]

Archive with 4 entries (4 files):
- 7392_demo.mp4
- __MACOSX/._7392_demo.mp4
- 7392_supp.pdf
- __MACOSX/._7392_supp.pdf
